# Supplementary material for: The Mechanics of Forming Ideal Polymer–Solvent Combinations for Open-Loop Chemical Recycling of Solvents and Plastics
Source: MDPI journal article supplement (doi:10.3390/polym14010112), 2021-12-29
Supplement: s1 [file s1]

# Supplementary file

## The Mechanics of Forming Ideal Polymer–Solvent Combinations for Open-Loop Chemical Recycling of Solvents and Plastics

Ioannis Tsampanakis<sup>1,2</sup>, Alvin Orbaek White<sup>1,2</sup> \*

<sup>1</sup> Energy Safety Research Institute, Swansea University, Bay Campus, Swansea SA1 8EN, UK; alvin.orbaekwhite@swansea.ac.uk (A.O.W.); 958003@Swansea.ac.uk (I.T.)

<sup>2</sup> Chemical Engineering, Faculty of Science and Engineering, Swansea University, Bay Campus, Swansea, SA1 8EN UK; alvin.orbaekwhite@swansea.ac.uk (A.O.W.); 958003@Swansea.ac.uk (I.T.)

\* Correspondence: alvin.orbaekwhite@swansea.ac.uk (A.O.W.)

**Table S1.** Hansen & Hildebrand solubility parameters of polymers & solvents

| Material                                  | Polymers                         |                                  |                                  |                                  | Interaction radius<br>R <sub>0</sub> |
|-------------------------------------------|----------------------------------|----------------------------------|----------------------------------|----------------------------------|--------------------------------------|
|                                           | $\delta_D$<br>Mpa <sup>0.5</sup> | $\delta_P$<br>Mpa <sup>0.5</sup> | $\delta_H$<br>Mpa <sup>0.5</sup> | $\delta_1$<br>Mpa <sup>0.5</sup> |                                      |
| Polystyrene (PS)                          | 18.5                             | 4.5                              | 2.9                              | 19.3                             | 5.3                                  |
| Polypropylene (PP)                        | 18                               | 0                                | 1                                | 18.0                             | 6                                    |
| Polyethylene - High Density (HDPE)        | 16                               | 0.8                              | 2.8                              | 16.3                             | 3.2                                  |
| Acrylonitrile - Butadiene - Styrene (ABS) | 16.3                             | 2.7                              | 7.1                              | 17.98                            | 7.8                                  |
|                                           | Solvents                         |                                  |                                  |                                  | R <sub>0</sub>                       |
|                                           | $\delta_D$                       | $\delta_P$                       | $\delta_H$                       | $\delta_1$                       |                                      |
| Acetone                                   | 15.5                             | 10.4                             | 7                                | 19.9                             | 74                                   |
| Acetonitrile                              | 15.3                             | 18                               | 6.1                              | 24.4                             | 52.6                                 |
| Benzene                                   | 18.4                             | 0                                | 2                                | 18.5                             | 89.4                                 |
| Chloroform                                | 17.8                             | 3.1                              | 5.7                              | 18.9                             | 80.7                                 |
| m-Cresol                                  | 18                               | 5.1                              | 12.9                             | 22.7                             | 104.7                                |
| Cyclohexanol                              | 17.4                             | 4.1                              | 13.5                             | 22.4                             | 106                                  |
| Cyclohexanone                             | 17.8                             | 6.3                              | 5.1                              | 19.6                             | 104                                  |
| 1,2 Dichlorobenze                         | 19.2                             | 6.3                              | 3.3                              | 20.5                             | 112.8                                |
| Dichloromethane                           | 18.2                             | 6.3                              | 6.1                              | 20.2                             | N/A                                  |
| Dimethylformamide                         | 17.4                             | 13.7                             | 11.3                             | 24.9                             | 77                                   |
| Ethanol                                   | 15.8                             | 8.8                              | 19.4                             | 26.5                             | 58.5                                 |
| Ethyl acetate                             | 15.8                             | 5.3                              | 7.2                              | 18.2                             | 98.5                                 |
| Heptane                                   | 15.3                             | 0                                | 0                                | 15.3                             | 147.4                                |
| Hexadecane                                | 16.3                             | 0                                | 0                                | 16.3                             | 294.1                                |
| Hexafluoro-2-propanol                     | 17.2                             | 4.5                              | 14.7                             | 23.1                             | 105.3                                |
| Hexane                                    | 14.9                             | 0                                | 0                                | 14.9                             | 131.6                                |
| Methanol                                  | 15.1                             | 12.3                             | 22.3                             | 29.6                             | 40.7                                 |
| Methyl Ethyl Ketone                       | 16                               | 9                                | 5.1                              | 19.1                             | 90.1                                 |
| Tetrahydrofuran                           | 16.8                             | 5.7                              | 8                                | 19.5                             | 81.7                                 |
| Toluene                                   | 18                               | 1.4                              | 2                                | 18.2                             | 106.8                                |
| Xylene                                    | 17.6                             | 1                                | 3.1                              | 17.9                             | 123.3                                |

**Table S2.** Solvents' distance from the centre for the RED method

| <b>R<sub>a</sub></b>                | <b>Distance from the Centre</b> |           |             |            |
|-------------------------------------|---------------------------------|-----------|-------------|------------|
|                                     | <b>PS</b>                       | <b>PP</b> | <b>HDPE</b> | <b>ABS</b> |
| Acetone                             | 9.4                             | 13.0      | 10.5        | 7.9        |
| Acetonitrile                        | 15.3                            | 19.5      | 17.6        | 15.5       |
| Benzene                             | 4.6                             | 1.3       | 4.9         | 7.1        |
| Chloroform                          | 3.4                             | 5.6       | 5.2         | 3.3        |
| m-Cresol                            | 10.1                            | 12.9      | 11.7        | 7.1        |
| Cyclohexanol                        | 10.8                            | 13.2      | 11.5        | 6.9        |
| Cyclohexanone                       | 3.2                             | 7.5       | 7.0         | 5.1        |
| 1,2 Dichlorobenze                   | 2.3                             | 7.1       | 8.5         | 7.8        |
| Dichloromethane                     | 3.7                             | 8.1       | 7.8         | 5.3        |
| Dimethylformamide                   | 12.7                            | 17.2      | 15.7        | 12.0       |
| Ethanol                             | 17.9                            | 20.9      | 18.4        | 13.8       |
| Ethyl acetate                       | 6.9                             | 9.3       | 6.3         | 2.8        |
| Heptane                             | 8.3                             | 5.5       | 3.2         | 7.9        |
| Hexadecane                          | 6.9                             | 3.5       | 3.0         | 7.6        |
| Hexafluoro-2-propanol               | 12.1                            | 14.5      | 12.7        | 8.0        |
| Hexane                              | 9.0                             | 6.3       | 3.6         | 8.1        |
| Methanol                            | 22.0                            | 25.3      | 22.7        | 18.1       |
| Methyl Ethyl Ketone                 | 7.1                             | 10.7      | 8.5         | 6.6        |
| Tetrahydrofuran                     | 6.2                             | 9.3       | 7.3         | 3.3        |
| Toluene                             | 3.4                             | 1.7       | 4.1         | 6.3        |
| Xylene                              | 3.9                             | 2.5       | 3.2         | 5.1        |
| 15% Acetonitrile<br>85% Toluene     | 1.9                             | 4.3       | 4.4         | 5.3        |
| 40% Cyclohexanone<br>60% Toluene    | 4.5                             | 1.3       | 3.4         | 6.6        |
| 50% Cyclohexanone<br>50% Xylene     | 2                               | 5.7       | 5.3         | 4.6        |
| 80% Cyclohexane<br>20% Cyclohexanol | 4.9                             | 3         | 1.8         | 4.8        |
| 87% Cyclohexanol<br>13% Ethanol     | 11.7                            | 14.2      | 12.3        | 7.7        |
| 25% Heptane<br>75% Xylene           | 4.8                             | 2.5       | 2.1         | 5.4        |
| 25% Cyclohexane<br>75% Toluene      | 4                               | 1.3       | 3.6         | 6.4        |
| 40% Cyclohexane<br>60% Xylene       | 4.7                             | 1.8       | 2.7         | 5.9        |

**Table S3.** Flory-Huggins parameters of selected solvents

| Solvent               | V(cm <sup>3</sup> /mol) | A <sub>1,2</sub> |       |       |      |
|-----------------------|-------------------------|------------------|-------|-------|------|
|                       |                         | PS               | PP    | HDPE  | ABS  |
| Acetone               | 74                      | 21.9             | 42.3  | 27.7  | 15.5 |
| Acetonitrile          | 100                     | 58.4             | 94.8  | 77.2  | 59.8 |
| Benzene               | 89.4                    | 5.3              | 0.4   | 6.1   | 12.7 |
| Chloroform            | 80.7                    | 2.9              | 8.0   | 6.7   | 2.8  |
| m-Cresol              | 100                     | 25.3             | 41.9  | 34.1  | 12.7 |
| Cyclohexanol          | 100                     | 29.3             | 43.6  | 33.3  | 11.9 |
| Cyclohexanone         | 104                     | 2.5              | 14.2  | 12.1  | 6.5  |
| 1,2 Dichlorobenze     | 100                     | 1.3              | 12.7  | 17.9  | 15.3 |
| Dichloromethane       | 100                     | 3.5              | 16.5  | 15.1  | 7.1  |
| Dimethylformamide     | 100                     | 40.0             | 73.8  | 61.6  | 35.9 |
| Ethanol               | 100                     | 80.0             | 108.8 | 84.9  | 47.4 |
| Ethyl Acetate         | 98.5                    | 12.1             | 21.5  | 9.9   | 1.9  |
| Heptane               | 100                     | 17.4             | 7.5   | 2.6   | 15.4 |
| Hexadecane            | 100                     | 12.0             | 3.1   | 2.2   | 14.4 |
| Hexafluoro-2-propanol | 100                     | 36.5             | 52.6  | 40.3  | 16.1 |
| Hexane                | 131.6                   | 20.1             | 9.9   | 3.3   | 16.4 |
| Methanol              | 40.7                    | 120.9            | 159.7 | 128.9 | 82.2 |
| Methyl Ethyl Ketone   | 90.1                    | 12.5             | 28.5  | 18.1  | 11.0 |
| Tetrahydrofuran       | 100                     | 9.8              | 21.8  | 13.4  | 2.7  |
| Toluene               | 106.8                   | 2.9              | 0.7   | 4.3   | 9.8  |
| Xylene                | 123.3                   | 3.9              | 1.5   | 2.6   | 6.4  |

**Table S4.** Fractional parameters of plastics & polymers for the creation of the Teas graph

| <b>Polymers / Solvents</b>               | <b>F<sub>D</sub></b> | <b>F<sub>P</sub></b> | <b>F<sub>H</sub></b> |
|------------------------------------------|----------------------|----------------------|----------------------|
| Polystyrene (P1)                         | 71.4                 | 17.4                 | 11.2                 |
| Polypropylene (P2)                       | 94.7                 | 0.0                  | 5.3                  |
| Polyethylene - High Density (P3)         | 81.6                 | 4.1                  | 14.3                 |
| Acrylonitrile - Butadiene - Styrene (P4) | 62.5                 | 10.3                 | 27.2                 |
| Acetone (S1)                             | 47.1                 | 31.6                 | 21.3                 |
| Acetonitrile (S2)                        | 38.8                 | 45.7                 | 15.5                 |
| Benzene (S3)                             | 90.2                 | 0.0                  | 9.8                  |
| Chloroform (S4)                          | 66.9                 | 11.7                 | 21.4                 |
| m-Cresol (S5)                            | 50.0                 | 14.2                 | 35.8                 |
| Cyclohexanol (S6)                        | 49.7                 | 11.7                 | 38.6                 |
| Cyclohexanone (S7)                       | 61.0                 | 21.6                 | 17.5                 |
| 1,2 Dichlorobenzene (S8)                 | 66.7                 | 21.9                 | 11.5                 |
| Dichloromethane (S9)                     | 59.5                 | 20.6                 | 19.9                 |
| Dimethylformamide (S10)                  | 41.0                 | 32.3                 | 26.7                 |
| Ethanol (S11)                            | 35.9                 | 20.0                 | 44.1                 |
| Ethyl acetate (S12)                      | 55.8                 | 18.7                 | 25.4                 |
| Heptane (S13)                            | 100.0                | 0.0                  | 0.0                  |
| Hexadecane (S14)                         | 100.0                | 0.0                  | 0.0                  |
| Hexafluoro-2-propanol (S15)              | 47.3                 | 12.4                 | 40.4                 |
| Hexane (S16)                             | 100.0                | 0.0                  | 0.0                  |
| Methanol (S17)                           | 30.4                 | 24.7                 | 44.9                 |
| Methyl Ethyl Ketone (S18)                | 53.2                 | 29.9                 | 16.9                 |
| Tetrahydrofuran (S19)                    | 55.1                 | 18.7                 | 26.2                 |
| Toluene (S20)                            | 84.1                 | 6.5                  | 9.3                  |
| Xylene (S21)                             | 81.1                 | 4.6                  | 14.3                 |
